# Supplementary material for: Disordered peptide chains in an α-C-based coarse-grained model
Source: Royal Society of Chemistry journal article supplement (doi:10.1039/c8cp03309a), 2018-01-01
Supplement: c8cp03309a1.pdf [file c8cp03309a1.pdf]

# Disordered peptide chains in an $\alpha$ -C-based coarse-grained model: Electronic Supplementary Information

Łukasz Mioduszeowski, Marek Cieplak

## 1 Distance distributions and lack of angular dependence

Figs. S1 through S3 show the distance distributions in the ss overlap-determined contacts for all pairs of amino acids for which an ss contact is possible. The distributions are only for the situations in which the directional criteria to make a contact are satisfied. The bin size is 0.1 Å and the columns add up to 1. Fig. S4 shows that there is very little correlation between the  $C_\alpha$ - $C_\alpha$  distance and the angles used in ss directional criteria (Fig. S4). This is illustrated for VAL-VAL (small side chains), GLN-GLN (mid-sized side chains) and ARG-ARG (large side chains).

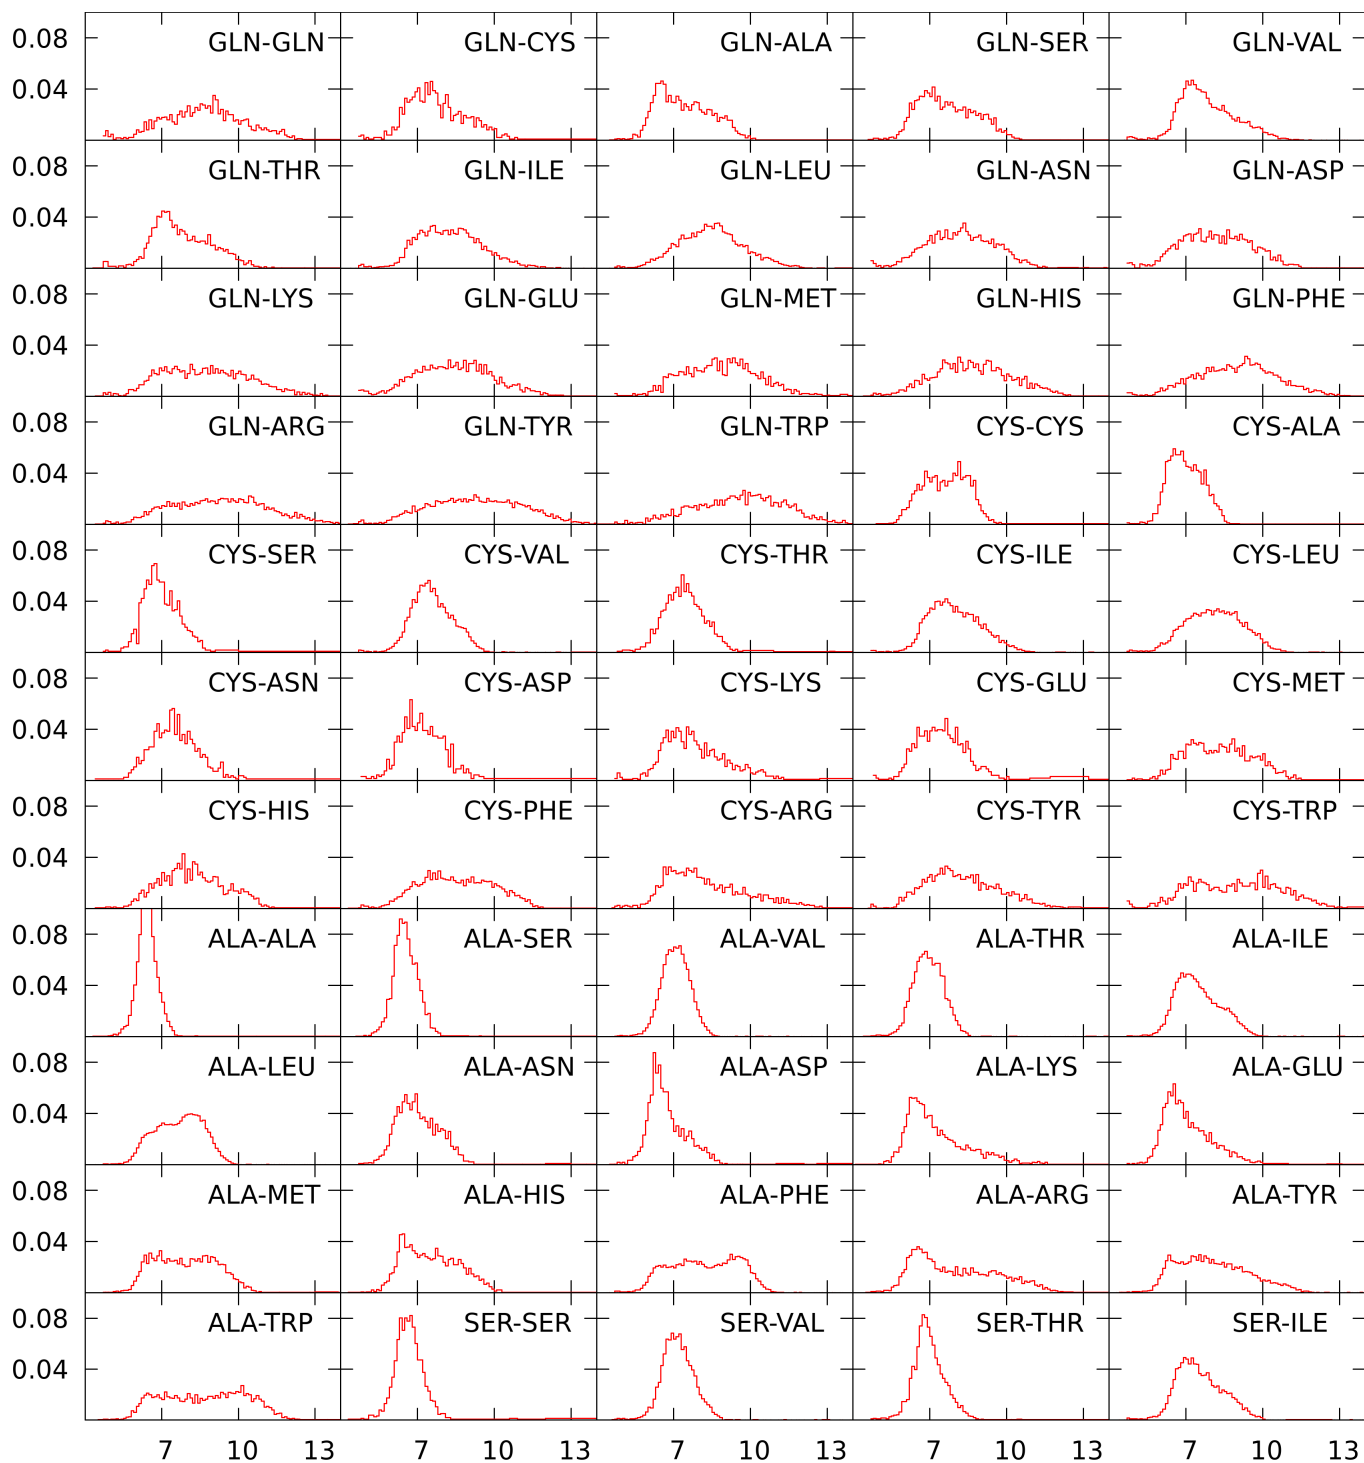

Figure S1: Distance distributions in the ss contacts for the indicated residues.

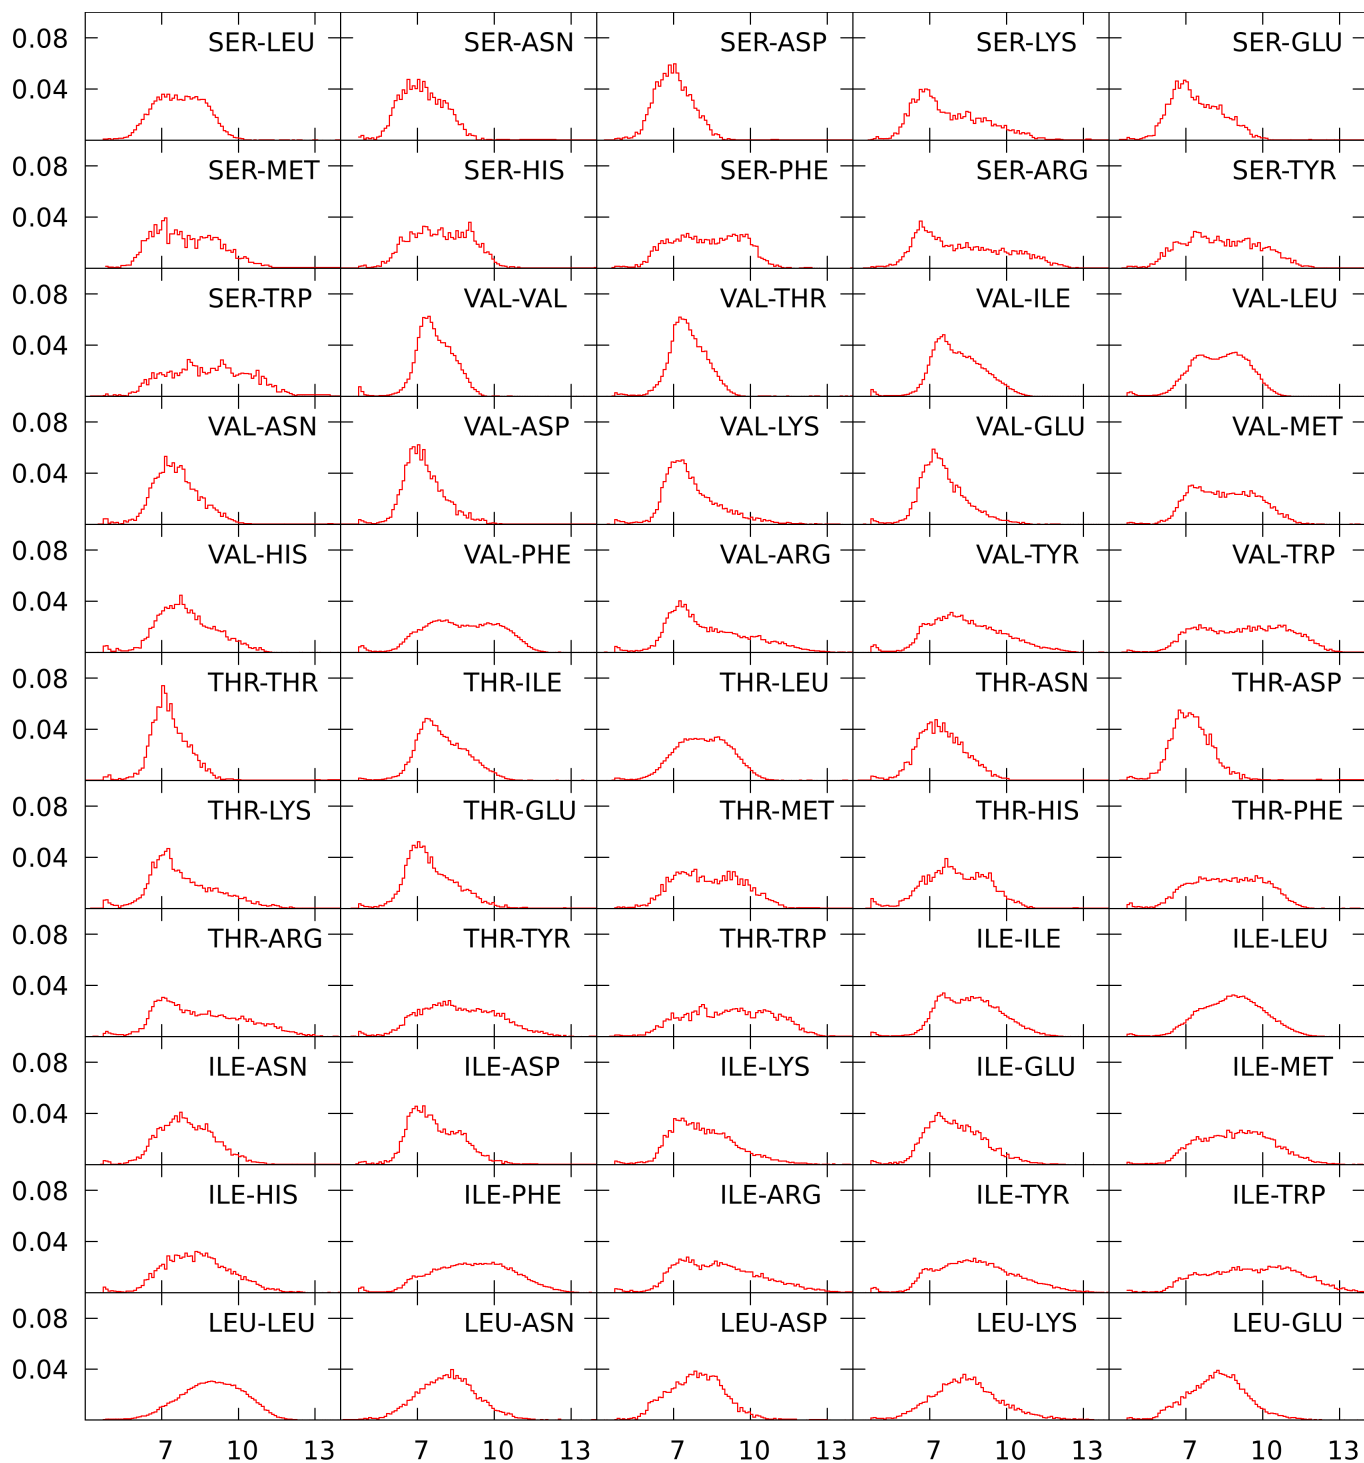

Figure S2: Distance distributions in the ss contacts for the indicated residues.

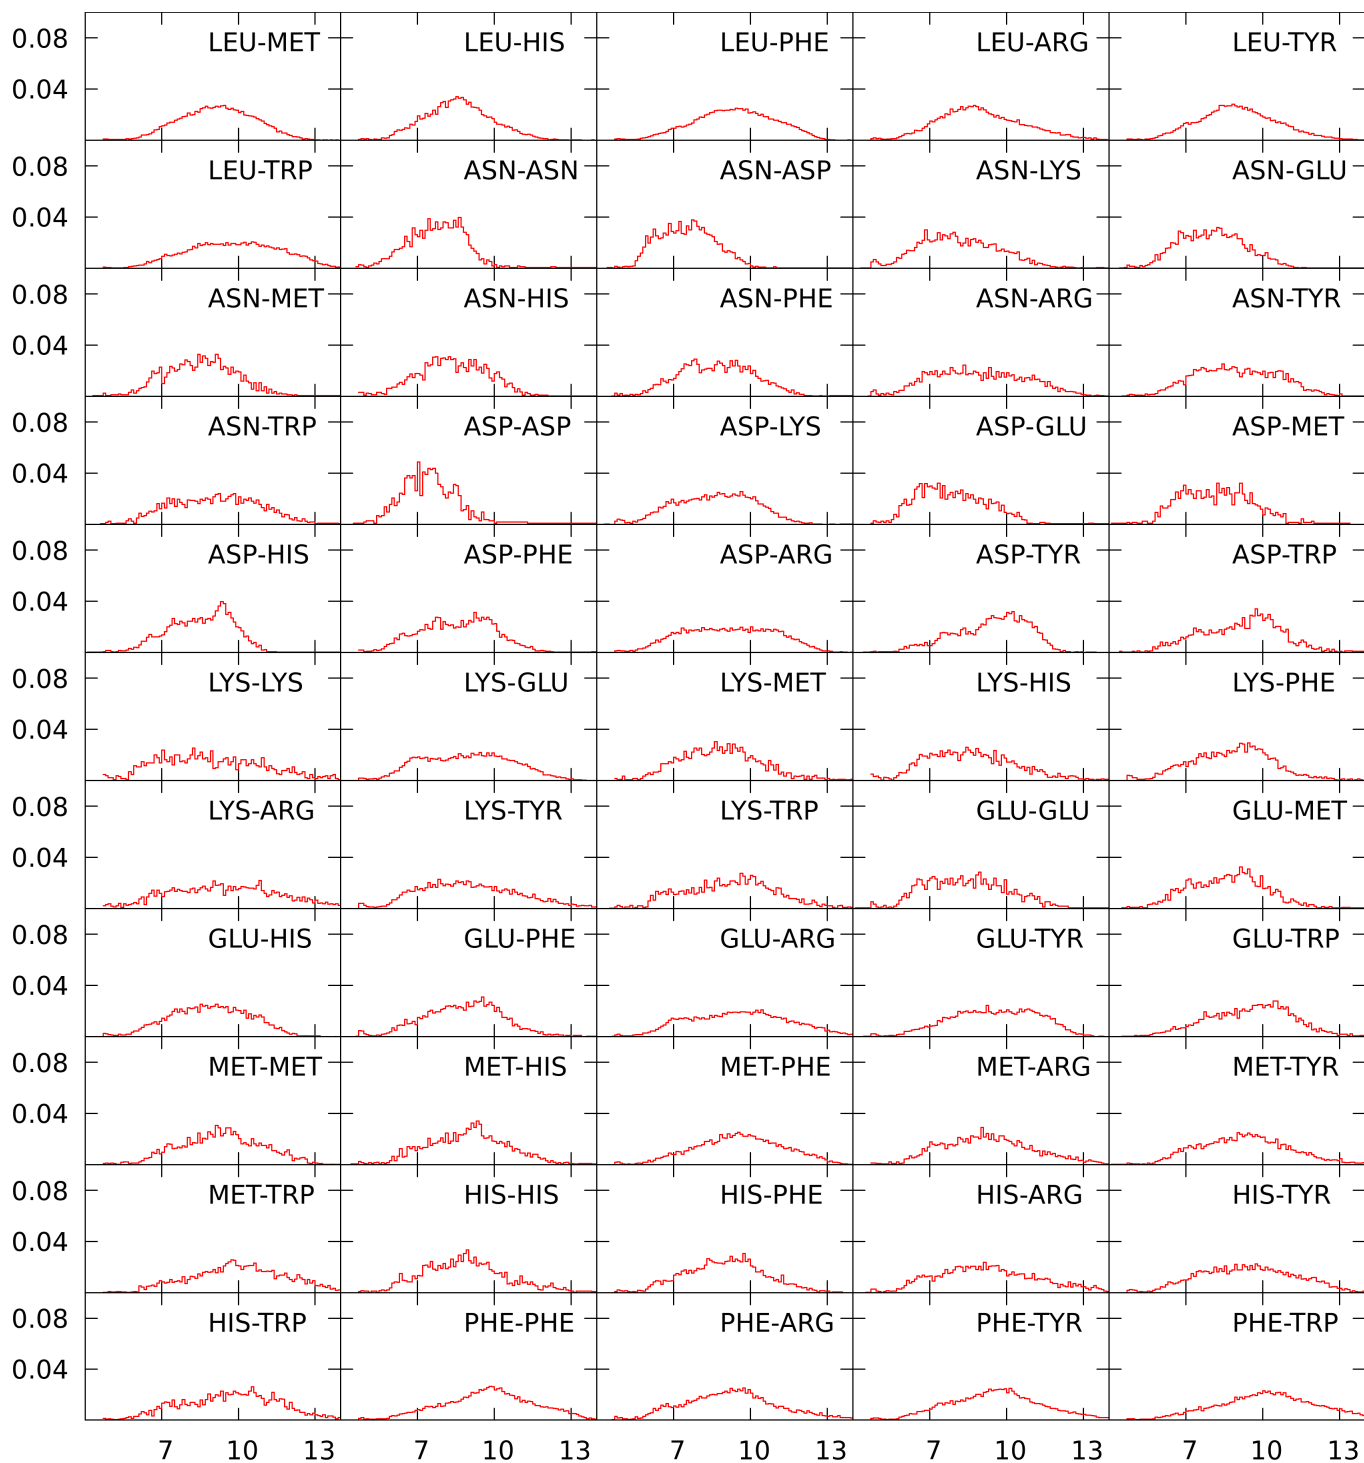

Figure S3: Distance distributions in the ss contacts for the indicated residues.

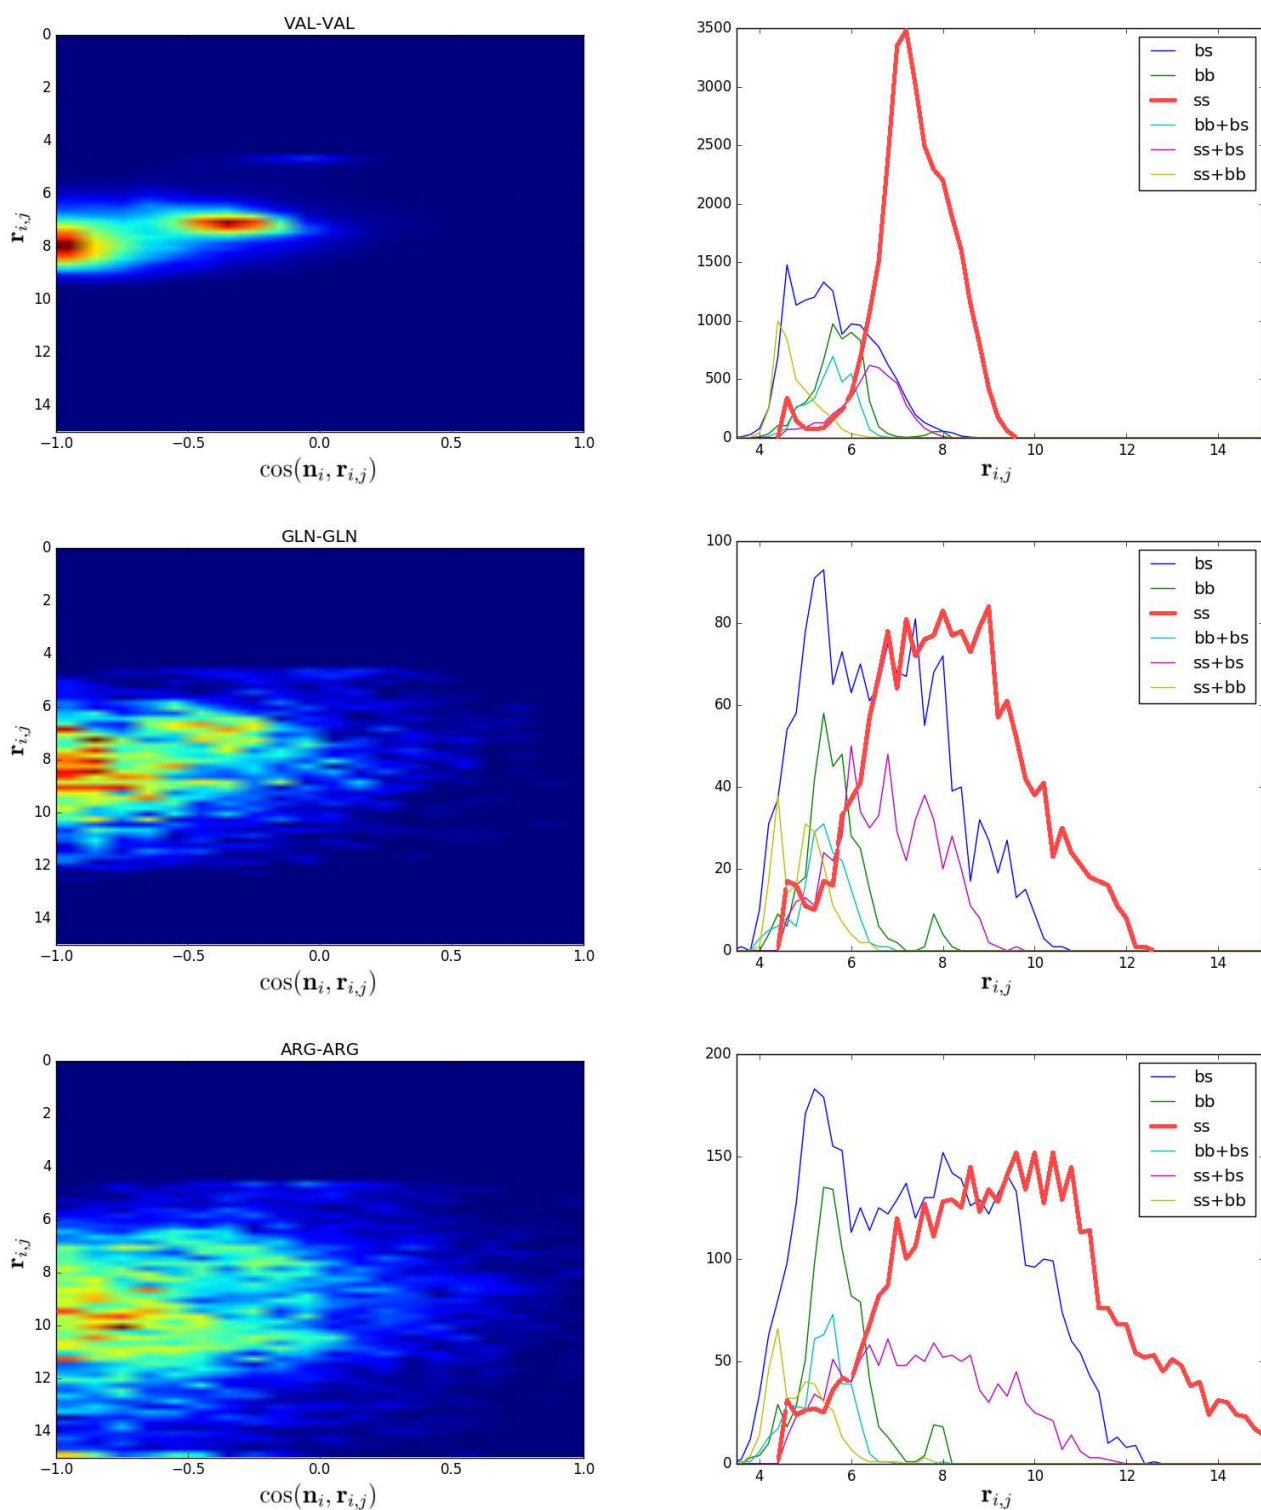

Figure S4: The left panels show 3D histograms of the C<sub>α</sub>-C<sub>α</sub> distance and  $\cos(\mathbf{n}_i, \mathbf{r}_{i,j})$  (the blue color means fewer contacts for that distance and cosine, the red color – more contacts) for the ss contacts. The right panels show 2D histograms of the C<sub>α</sub>-C<sub>α</sub> distance. See main text for the definition of  $\mathbf{n}_i, \mathbf{r}_{i,j}$ .

## 2 The angle-dependent potentials

We use a level-2 angle potential [1], which means that its form depends on 2 subsequent amino acids. All coefficients given here in kJ/mol were converted to  $\epsilon$  units assuming  $\epsilon = 6.6 \text{ kJ/mol} = 1.58 \text{ kcal/mol}$ .

### 2.1 Bending (bond) angle

We fit the statistical potentials to a sixth degree polynomial of the type  $ax^6 + bx^5 + cx^4 + dx^3 + ex^2 + fx + g = 0$  ( $x$  is bending angle in radians). The coefficients are listed in Table S1. Three examples of the resulting fits are presented (Fig. S5).

| Residue types | g         | f          | e         | d          | c         | b         | a       |
|---------------|-----------|------------|-----------|------------|-----------|-----------|---------|
| OGY           | 137767.79 | -417519.49 | 523500.78 | -347689.12 | 129057.84 | -25394.62 | 2070.23 |
| OGP           | 54278.92  | -166180.67 | 210155.26 | -140514.29 | 52413.91  | -10347.96 | 845.30  |
| OPY           | 228674.80 | -725717.73 | 953197.76 | -663471.51 | 258240.30 | -53322.81 | 4566.15 |
| OPP           | 70917.09  | -225383.01 | 295803.17 | -205330.47 | 79600.56  | -16366.17 | 1396.80 |
| OXY           | 104836.85 | -322892.77 | 411580.60 | -277931.71 | 104885.76 | -20978.03 | 1737.72 |
| OXP           | 111628.30 | -353562.64 | 462991.27 | -320775.91 | 124020.92 | -25374.95 | 2147.03 |

Table S1: Coefficients used in the polynomial fitting (in kJ/mol) for 6 different cases. O is any amino acid, Y any amino acid except for P, X any amino acid except for G and P.

### 2.2 Dihedral angle

The dihedral angle potential was fitted to a function with 5 coefficients:  $a \sin(x) + b \cos(x) + c \sin^2(x) + d \cos^2(x) + e \sin(x) \cos(x) + f$ . The coefficients used ( $a, b, c, d, e$ ) are listed in Table S2).

| Residue types | f     | a      | b      | c      | d     | e      |
|---------------|-------|--------|--------|--------|-------|--------|
| GG            | 2.117 | -0.008 | 0.004  | -0.125 | 0.425 | -0.061 |
| GP            | 2.639 | 0.929  | -0.185 | 0.016  | 0.286 | 0.073  |
| GX            | 2.149 | -0.006 | 0.203  | -0.161 | 0.461 | 0.133  |
| PG            | 2.165 | -0.102 | 0.109  | 0.149  | 0.152 | -0.742 |
| PP            | 3.205 | 1.171  | 0.091  | -0.254 | 0.558 | -1.570 |
| PX            | 2.304 | 0.115  | 0.429  | 0.201  | 0.100 | -0.803 |
| XG            | 2.136 | 0.018  | -0.071 | 0.122  | 0.179 | -0.624 |
| XP            | 2.740 | 0.739  | 0.686  | 0.219  | 0.083 | -0.791 |
| XX            | 2.142 | 0.006  | 0.257  | 0.155  | 0.146 | -0.448 |

Table S2: Coefficients of fitting the dihedral potential (in kJ/mol) for 9 different combinations of the two middle amino acids. X can be any amino acid except for G and P.

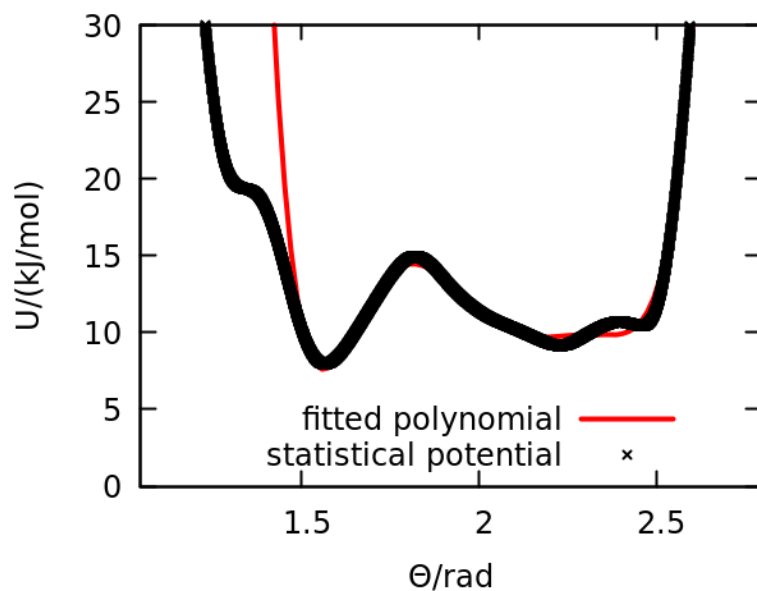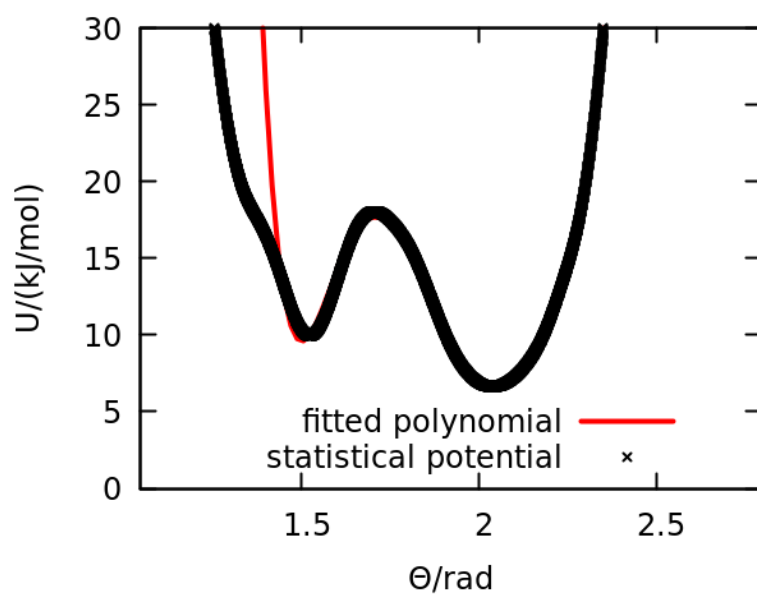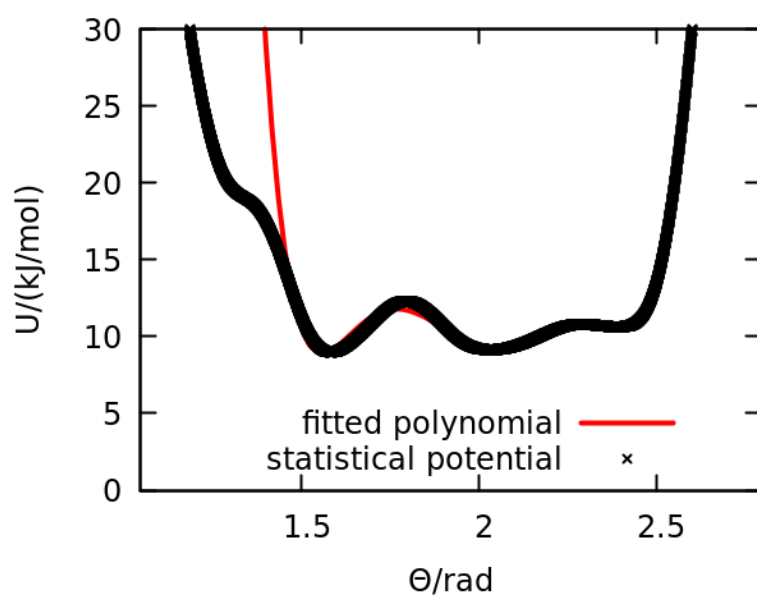

Figure S5: Statistical bending potential [1] (black) and fitted polynomial (red) for OGY, OPY and OXY (code as in [1] and in Table S1).

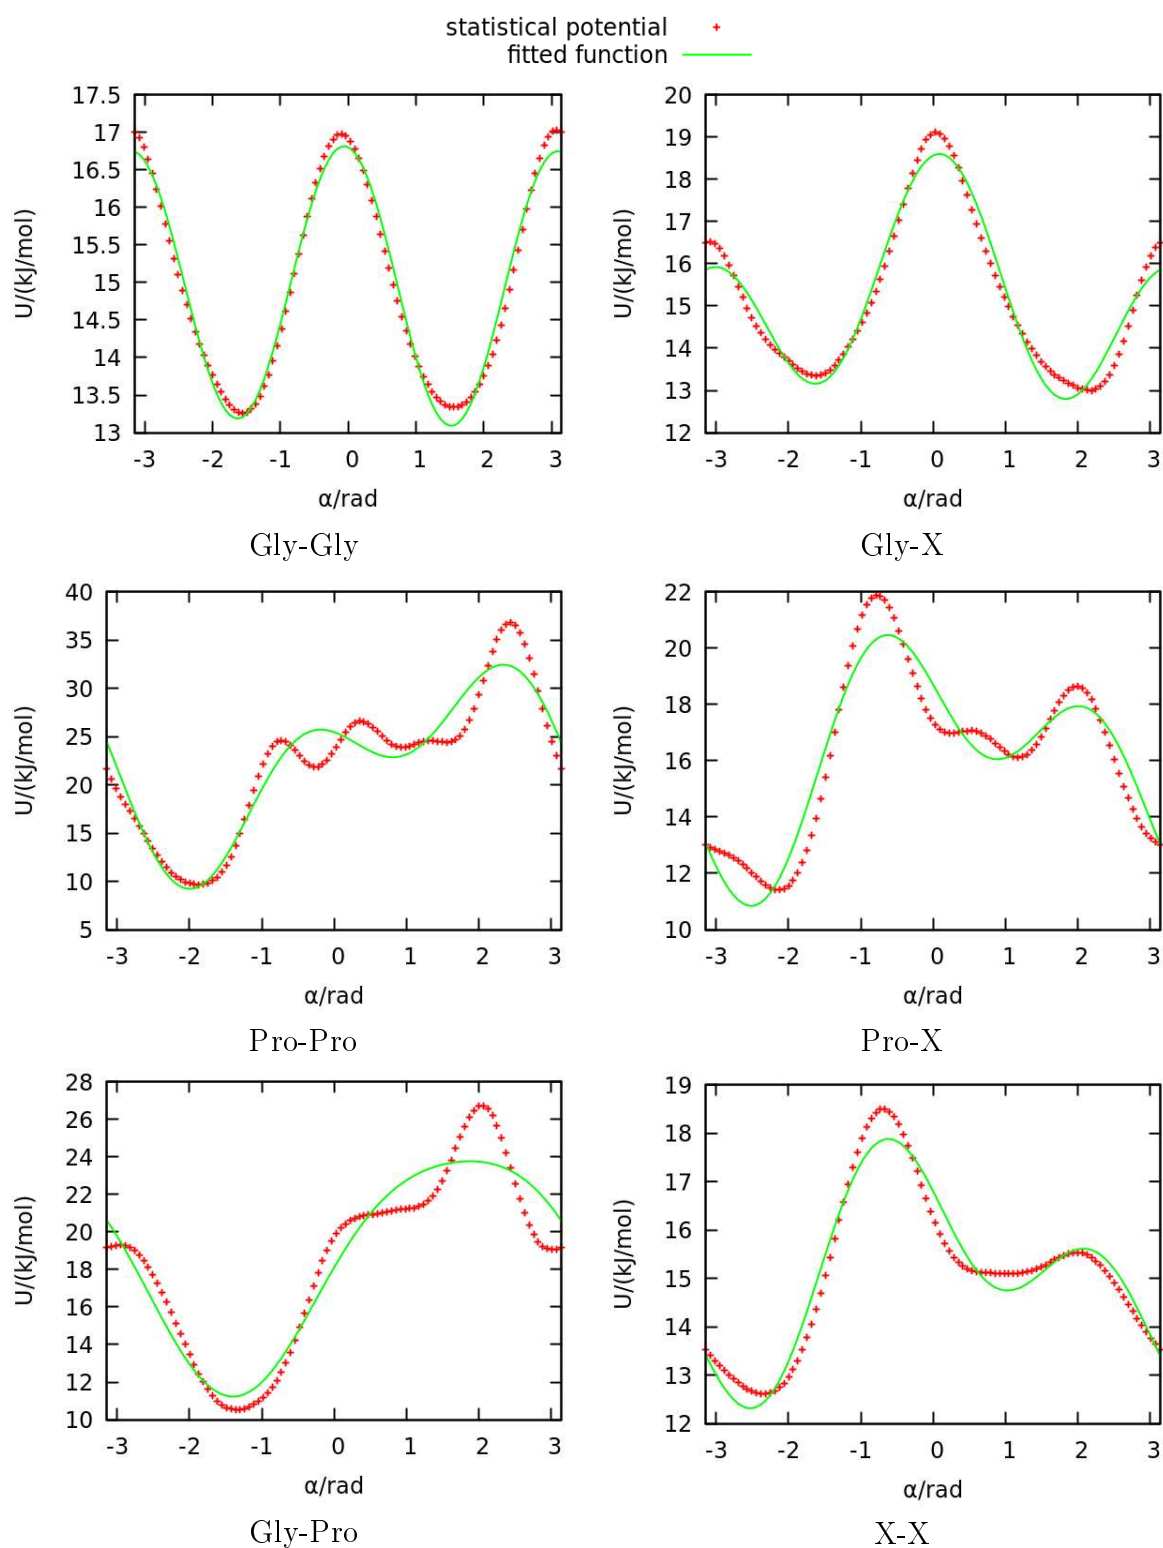

Figure S6: Statistical dihedral potential [1] (dots) and fitted polynomial (lines) for different cases (code as in [1] and in Table S1).



### 3 Turning contacts on and off adiabatically

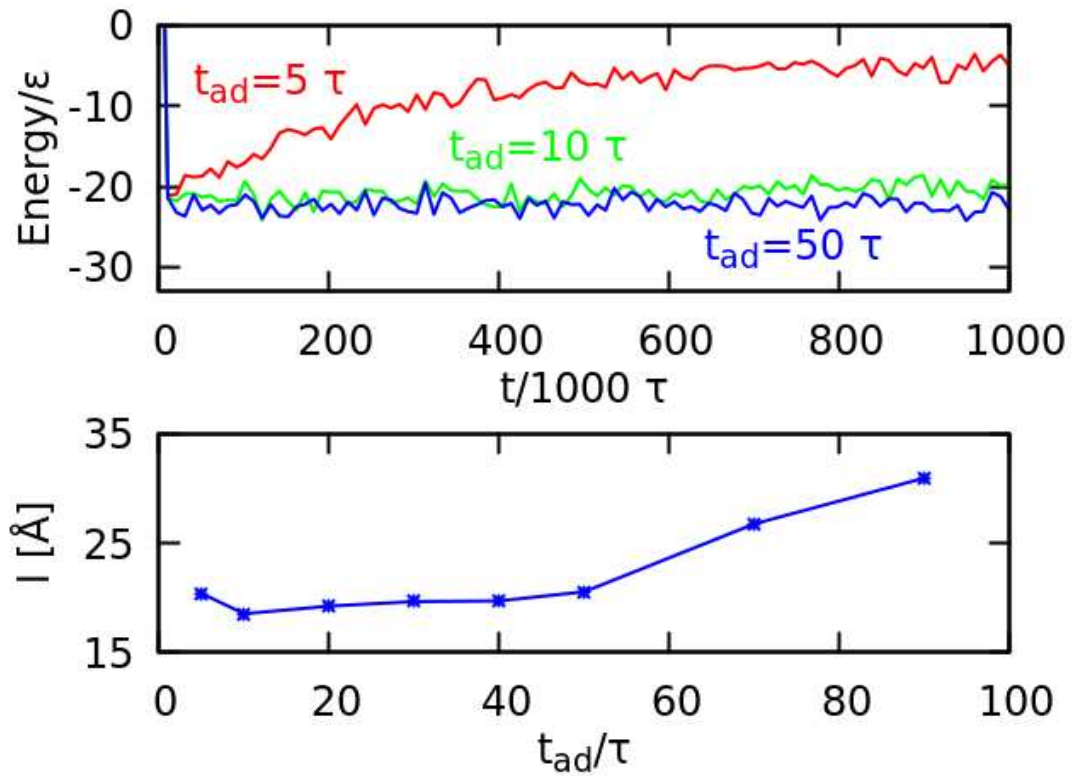

Figure S7: Data for the  $Q_{30}$  system for the various durations,  $t_{ad}$ , of the adiabatic switching on and off of the contacts. The top panel shows the smoothed total energy,  $E$ , as a function of time in a single trajectory. The bottom panel shows the end-to-end distance,  $l$ , as a function of  $t_{ad}$  as averaged over 100 trajectories. The error of the mean is of the order of the datapoint size. The variance,  $\sigma$ , also gets larger when  $t_{ad}$  exceeds  $50 \tau$ .

## 4 Temperature selection

Fig. S8 shows the equilibrium values of end-to-end distance for several temperatures for systems containing polyQ tracts. The best agreement with the all-atom and experimental data is obtained for  $T = 0.3 \epsilon/k_B$ .

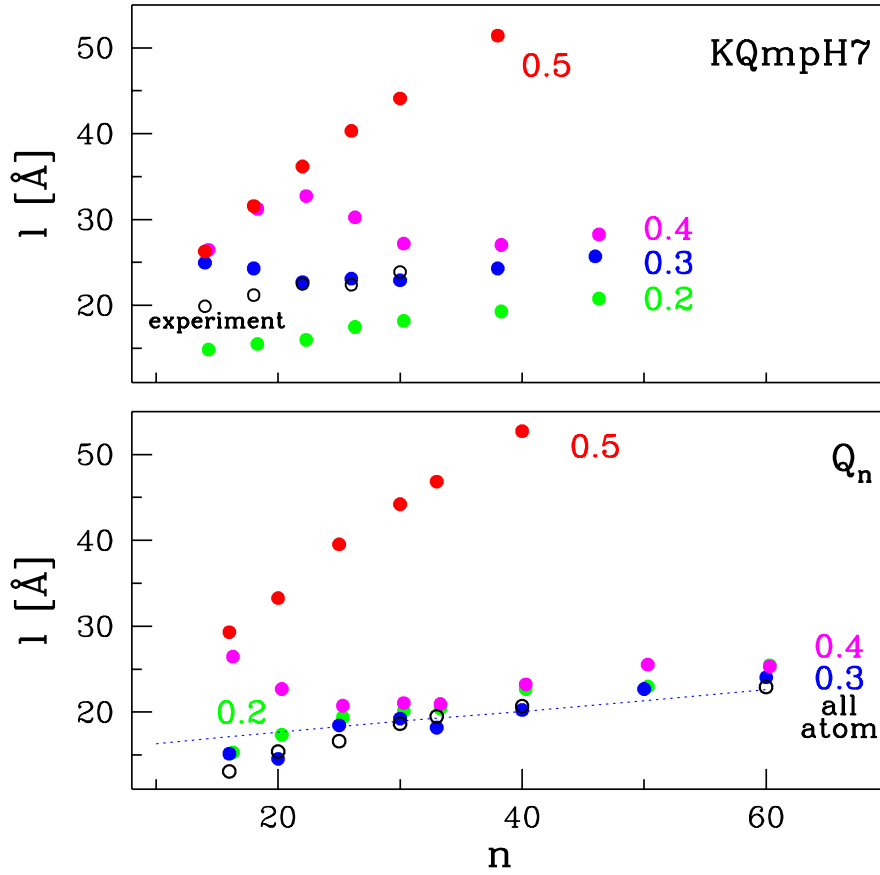

Figure S8: Average end-to-end distance as a function of the sequence length for polyQ (bottom panel) and for sequences of type  $KKWQ_mAKK$  (top panel). The four temperatures indicated are in units of  $\epsilon/k_B$ . The solid data points are obtained by using our coarse-grained model. The open circles are based on the all-atom [3] and experimental [4] results. The error of the mean is lower than size of points.

## 5 Time evolution

Fig. S9 shows  $f_{cc}$  matrices of 4 different homopolymers, differing in length and composition. The fraction of common contacts ( $f_{cc}$ ) between two structures is computed as number of their common contacts divided by the total number of contacts in the structure that contains more contacts. Sharp changes in the  $f_{cc}$  correspond to conformational transitions.

To quantify these transitions, the following clustering algorithm was developed: two structures are in one cluster if  $f_{cc}$  between them is larger than a certain threshold (50 %) and they are next to each other in the timeline (the algorithm works by joining neighboring clusters and  $f_{cc}$  between clusters is computed as an average  $f_{cc}$  between structures). The red lines denote borders between clusters. The thresholds are system-dependent ( $A_{30}$  is much more mobile and has too many conformational clusters in a given timescale, whereas  $N_{60}$  is much more sluggish; in the latter case, some conformational changes in the first 150 000  $\tau$  are omitted). We observe that for some systems, large conformational changes take place on the scale of hundreds of microseconds. PolyA is found to keep forming a helix and then unravel it again, in distinction to all-atom results obtained for larger values of  $n$ . This behaviour of polyA can be due to the approximate nature of our model, but this can also be a matter of adopting relevant time scales.

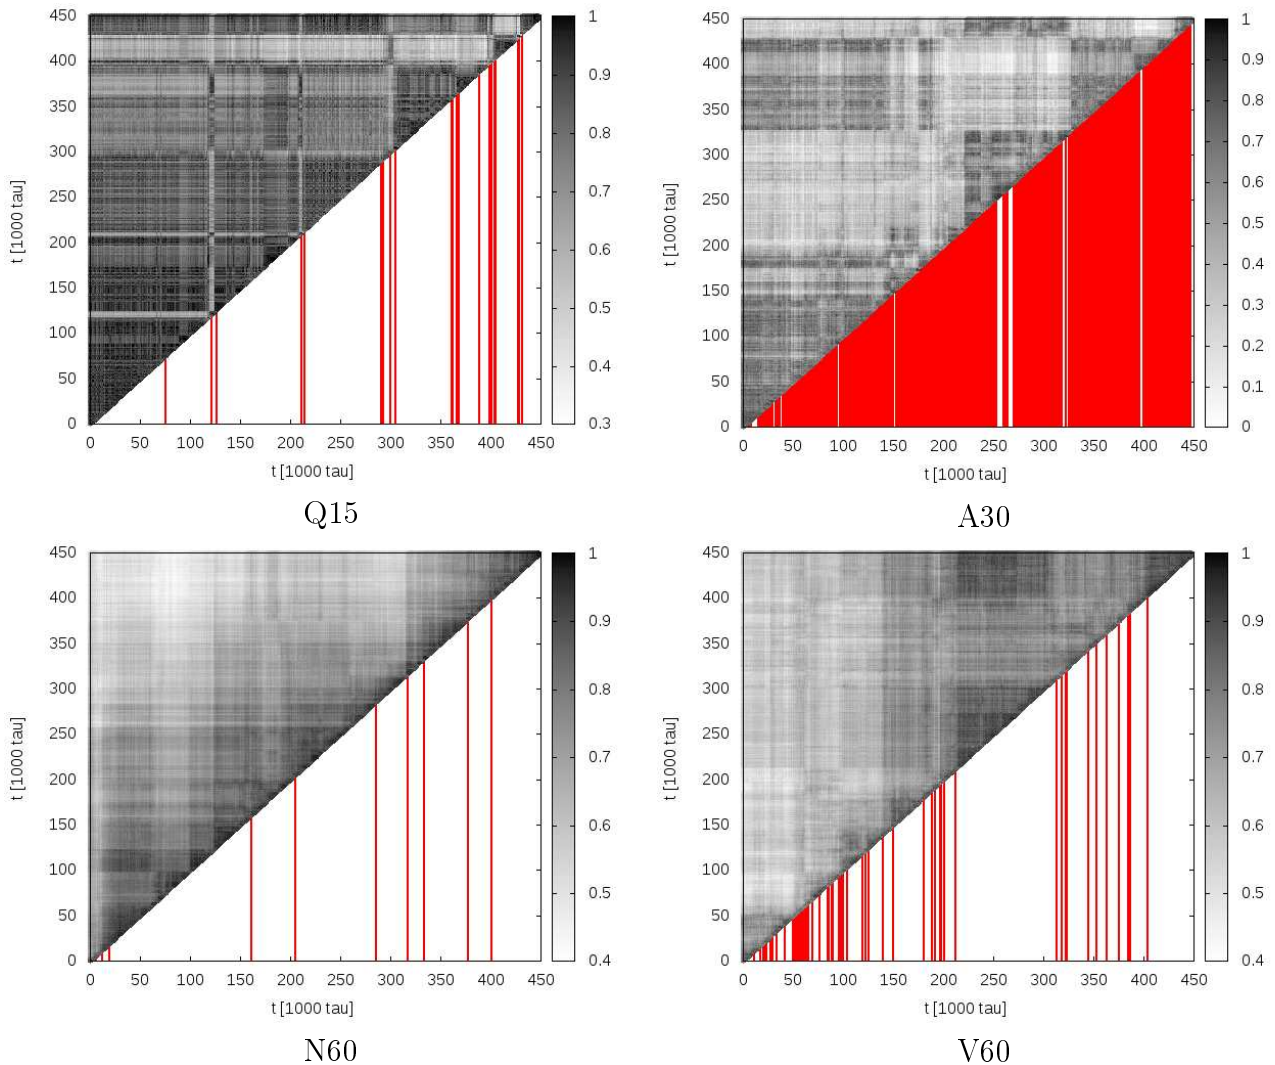

Figure S9: The  $f_{cc}$  matrices (fraction of the same contacts between structures from different times, saved every 1000  $\tau$ ) for different homopolymers. The red lines are explained in the text.

## 6 Replacing LYS with ASN to mimic pH change

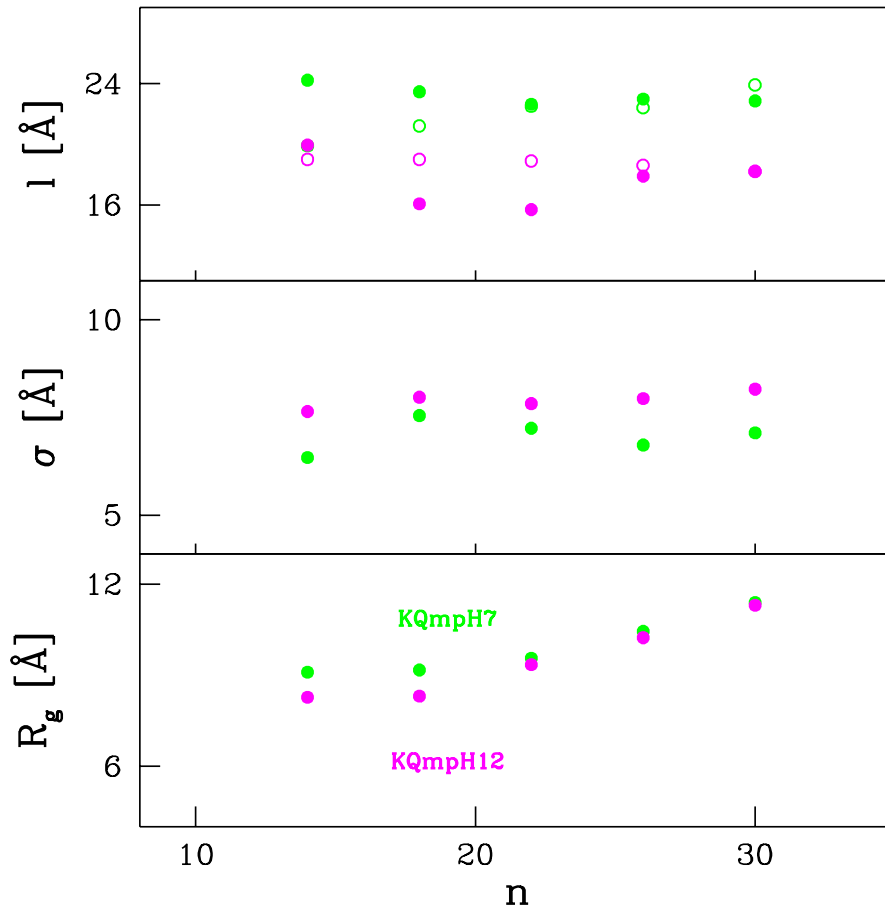

Figure S10: The results obtained by our IDP coarse-grained model for  $Q_m$  flanked with lysine (solid green circles) and asparagine (solid purple circles) as a function of the number of residues,  $n$ . The top panel is for  $l$ , the middle for  $\sigma$ , and the bottom one for  $R_g$ . The open circles correspond to the results obtained by experiment as in ref. [4].

## References

- [1] A. Ghavani, E. van der Giessen, and P. R. Onck, Coarse-grained potentials for local interactions in unfolded proteins, *J. Chem. Theor. Comp.*, 2013, **9**, 432-440.
- [2] M. Chwastyk, M. Jaskólski and M. Cieplak, The volume of cavities in proteins and virus capsids, *Proteins*, 2016, **84(9)**, 1275-86.
- [3] Á. Gómez-Sicilia, M. Sikora, M. Cieplak and M. Carrión-Vázquez, An exploration of the universe of polyglutamine structures *PLoS Comp. Biol.*, 2015, **11**, e1004541.
- [4] R. H. Walters & R. M. Murphy, Examining Polyglutamine Peptide Length: A Connection between Collapsed Conformations and Increased Aggregation. *J. Mol. Biol.*, 2009, **393(4)**, 978-992.
